# Supplementary material for: Rate-induced tipping cascades arising from interactions between the Greenland Ice Sheet and the Atlantic Meridional Overturning Circulation
Source: Copernicus journal article supplement (doi:10.5194/esd-2023-20), 2023-09-22
Supplement: Supplementary file 1 [file esd-2023-20-supplement.pdf]

# Supplementary Material: Rate-induced tipping cascades arising from interactions between the Greenland Ice Sheet and the Atlantic Meridional Overturning Circulation

Ann Kristin Klose<sup>1,2</sup>, Jonathan F. Donges<sup>1,3</sup>, Ulrike Feudel<sup>4</sup>, and Ricarda Winkelmann<sup>1,2</sup>

<sup>1</sup>FutureLab Earth Resilience in the Anthropocene, Earth System Analysis & Complexity Science, Potsdam Institute for Climate Impact Research (PIK), Member of the Leibniz Association, P.O. Box 6012 03, D-14412 Potsdam Germany

<sup>2</sup>Institute of Physics and Astronomy, University of Potsdam, 14476 Potsdam, Germany

<sup>3</sup>Stockholm Resilience Centre, Stockholm University, Stockholm, SE-10691, Sweden

<sup>4</sup>Theoretical Physics/Complex Systems, ICBM, University of Oldenburg, 26129 Oldenburg, Germany

**Correspondence:** Ann Kristin Klose (annkristin.klose@pik-potsdam.de) and Ricarda Winkelmann (ricarda.winkelmann@pik-potsdam.de)

## S1 Parameters for the AMOC box model and flowline model of the Greenland Ice Sheet

**Table S1.** Parameters of the AMOC box model (Eq. (4)–(11)) and the flowline model of the Greenland Ice Sheet (Eq. (1)–(3)). The AMOC box model parameters were determined by a calibration of the AMOC box model to a quasi–equilibrated ocean obtained from the coarse–resolution AOGCM FAMOUS<sub>B</sub> (Smith, 2012) under preindustrial atmospheric CO<sub>2</sub> concentration conditions (Wood et al., 2019). For details on the calibration procedure it is referred to Wood et al. (2019).

| AMOC box model |                           |                                                       | Flowline model of the Greenland Ice Sheet |                   |                                     |
|----------------|---------------------------|-------------------------------------------------------|-------------------------------------------|-------------------|-------------------------------------|
| $\alpha$       | 0.12                      | kg m <sup>-3</sup> °C <sup>-1</sup>                   | $A$                                       | 10 <sup>-16</sup> | a <sup>-1</sup> Pa <sup>-3</sup>    |
| $\beta$        | 0.79                      | kg m <sup>-3</sup> psu <sup>-1</sup>                  | $n$                                       | 3                 |                                     |
| $S_0$          | 35                        |                                                       | $\rho$                                    | 916.7             | kg m <sup>-3</sup>                  |
| $T_S$          | 4.773                     | °C                                                    | $L$                                       | 600               | km                                  |
| $T_0$          | 2.650                     | °C                                                    | $g$                                       | 9.81              | m s <sup>-2</sup>                   |
| $\eta$         | 74.492                    | Sv                                                    | $\Gamma$                                  | 5                 | °C km <sup>-1</sup>                 |
| $K_N$          | 5.456                     | Sv                                                    | $\gamma$                                  | 4.4               | cm a <sup>-1</sup> °C <sup>-1</sup> |
| $K_S$          | 5.447                     | Sv                                                    |                                           |                   |                                     |
| $K_{IP}$       | 96.817                    | Sv                                                    |                                           |                   |                                     |
| $\lambda$      | 2.79 × 10 <sup>7</sup>    | m <sup>6</sup> kg <sup>-1</sup> s <sup>-1</sup>       |                                           |                   |                                     |
| $\kappa$       | 0.39                      |                                                       |                                           |                   |                                     |
| $\mu$          | 5.5                       | °C <sup>-1</sup> m <sup>-3</sup> s × 10 <sup>-8</sup> |                                           |                   |                                     |
| $V_N$          | 3.261 × 10 <sup>16</sup>  | m <sup>3</sup>                                        |                                           |                   |                                     |
| $V_T$          | 7.777 × 10 <sup>16</sup>  | m <sup>3</sup>                                        |                                           |                   |                                     |
| $V_S$          | 8.897 × 10 <sup>16</sup>  | m <sup>3</sup>                                        |                                           |                   |                                     |
| $V_{IP}$       | 22.02 × 10 <sup>16</sup>  | m <sup>3</sup>                                        |                                           |                   |                                     |
| $V_B$          | 86.490 × 10 <sup>16</sup> | m <sup>3</sup>                                        |                                           |                   |                                     |

**Table S2.** Initial conditions for the salinities of the AMOC box model (Eq. (4)–(11)) as given in Alkhayuon et al. (2019) determining the constant total salt content  $C$ .

| Parameter |          |
|-----------|----------|
| $S_N$     | 0.034912 |
| $S_T$     | 0.035435 |
| $S_S$     | 0.034427 |
| $S_{IP}$  | 0.034668 |
| $S_B$     | 0.034538 |

**Table S3.** Surface freshwater fluxes (Eq. (11)) applied to the AMOC box model (Eq. (4)–(11)) following Wood et al. (2019).

| Parameter  | Preindustrial FAMOUS <sub>B</sub> |    |
|------------|-----------------------------------|----|
| $F_{N_0}$  | 0.384                             | Sv |
| $F_{S_0}$  | 1.078                             | Sv |
| $F_{T_0}$  | -0.723                            | Sv |
| $F_{IP_0}$ | -0.739                            | Sv |
| $A_N$      | 0.070                             | Sv |
| $A_S$      | -0.257                            | Sv |
| $A_T$      | 0.752                             | Sv |
| $A_{IP}$   | -0.565                            | Sv |

**S2 Effects of varying coupling strength and rates of GIS surface mass balance decrease on emergent dynamics regimes**

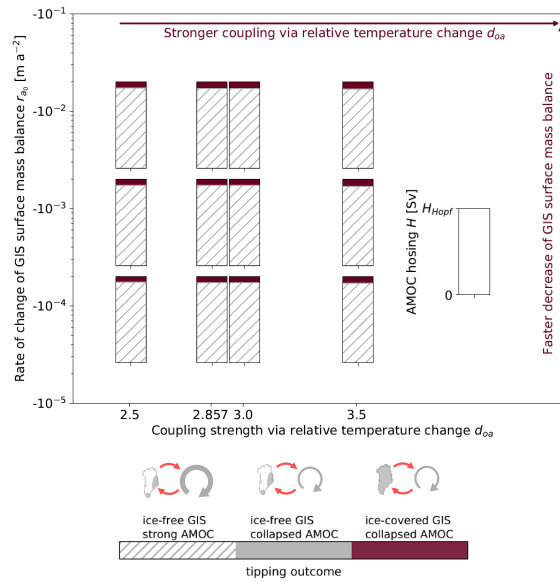

**Figure S1. Emergent dynamics regimes of the Greenland Ice Sheet and the Atlantic Meridional Overturning Circulation for bidirectional coupling.** Tipping outcomes in response to a limited linear decrease of the Greenland Ice Sheet surface mass balance on the ground with a ramping rate  $r_{a_0}$  (varied along outer vertical axis) for varying coupling via relative temperature change  $d_{oa}$  (varied along the outer horizontal axis). The AMOC hosing (vertical axis of bars) is kept constant between  $H = 0$  Sv and the AMOC hosing threshold  $H_{Hopf}$ . The respective tipping outcome is indicated by the colouring (grey: GIS deglaciation, pink: no GIS deglaciation; stripes additionally indicate the AMOC in its 'on'-state).

## References

- 5 Alkhayuon, H., Ashwin, P., Jackson, L. C., Quinn, C., and Wood, R. A.: Basin bifurcations, oscillatory instability and rate-induced thresholds for Atlantic meridional overturning circulation in a global oceanic box model, *Proceedings of the Royal Society A: Mathematical, Physical and Engineering Sciences*, 475, 20190051, <https://doi.org/10.1098/rspa.2019.0051>, 2019.
- Smith, R.: The FAMOUS climate model (versions XFXWB and XFHCC): description update to version XDBUA, *Geoscientific Model Development*, 5, 269–276, <https://doi.org/10.5194/gmd-5-269-2012>, 2012.
- 10 Wood, R. A., Rodríguez, J. M., Smith, R. S., Jackson, L. C., and Hawkins, E.: Observable, low-order dynamical controls on thresholds of the Atlantic Meridional Overturning Circulation, *Climate Dynamics*, 53, 6815–6834, <https://doi.org/10.1007/s00382-019-04956-1>, 2019.
